# Supplementary material
Source: PubMed Central journal article supplement (PMC4987847)
Supplement: npp201649x7.pdf [file npp201649x7.pdf]

| Genotype | Drug        | Time in CS+ During Preconditioning (s) | Time in CS+ After Conditioning (s) | Drug x Test F and p values                | Post hoc Pre vs Post p value |
|----------|-------------|----------------------------------------|------------------------------------|-------------------------------------------|------------------------------|
| WT       | Vehicle     | 26.3 ± 1.7                             | 31.7 ± 2.8                         | F (2,30) = 6.126,<br><b>p = 0.006</b>     | p = 0.233                    |
|          | 4 mg/kg DZ  | 24.2 ± 1.6                             | 25.7 ± 5.1                         |                                           | p = 0.741                    |
|          | 20 mg/kg CC | 22.8 ± 3.2                             | <b>46.8 ± 3.8***</b>               |                                           | <b>p &lt; 0.001</b>          |
| DZα1     | Vehicle     | 25.8 ± 2.3                             | 32.4 ± 4.5                         | F (2,30) = 10.859,<br><b>p &lt; 0.001</b> | p = 0.790                    |
|          | 4 mg/kg DZ  | 24.4 ± 2.3                             | 24.1 ± 3.4                         |                                           | p = 0.387                    |
|          | 20 mg/kg CC | 25.8 ± 1.4                             | <b>46.5 ± 6.5***</b>               |                                           | <b>p &lt; 0.001</b>          |
| DZα2     | Vehicle     | 26.2 ± 1.6                             | 38.3 ± 6.3                         | F (2,30) = 10.735,<br><b>p &lt; 0.001</b> | p = 0.252                    |
|          | 4 mg/kg DZ  | 20.7 ± 2.3                             | 20.1 ± 4.4                         |                                           | p = 0.458                    |
|          | 20 mg/kg CC | 22.0 ± 1.6                             | <b>44.1 ± 5.6***</b>               |                                           | <b>p &lt; 0.001</b>          |
| DZα3     | Vehicle     | 26.6 ± 1.3                             | <b>35.2 ± 6.1*</b>                 | F (2,30) = 14.362,<br><b>p &lt; 0.001</b> | <b>p = 0.045</b>             |
|          | 4 mg/kg DZ  | 24.5 ± 2.2                             | 16.4 ± 4.0                         |                                           | p = 0.137                    |
|          | 20 mg/kg CC | 22.8 ± 2.5                             | <b>49.3 ± 7.6***</b>               |                                           | <b>p &lt; 0.001</b>          |
| DZα5     | Vehicle     | 26.0 ± 1.9                             | 26.0 ± 4.1                         | F (2,30) = 2.559,<br>p = 0.094            | N/A                          |
|          | 4 mg/kg DZ  | 20.4 ± 1.6                             | 25.4 ± 3.8                         |                                           | N/A                          |
|          | 20 mg/kg CC | 26.6 ± 2.5                             | 48.4 ± 4.3                         |                                           | N/A                          |
| DZα5     | Vehicle     | 18.8 ± 1.4                             | 31.5 ± 4.8                         | F (1,21) = 0.129,<br>p = 0.723            | N/A                          |
|          | 10 mg/kg DZ | 18.8 ± 2.0                             | 34.0 ± 4.4                         |                                           | N/A                          |

**Table S1**
